# Supplementary material
Source: PubMed Central journal article supplement (PMC10861140)
Supplement: NIHMS1939017-supplement-Supplementary_Material.pdf [file NIHMS1939017-supplement-Supplementary_Material.pdf]

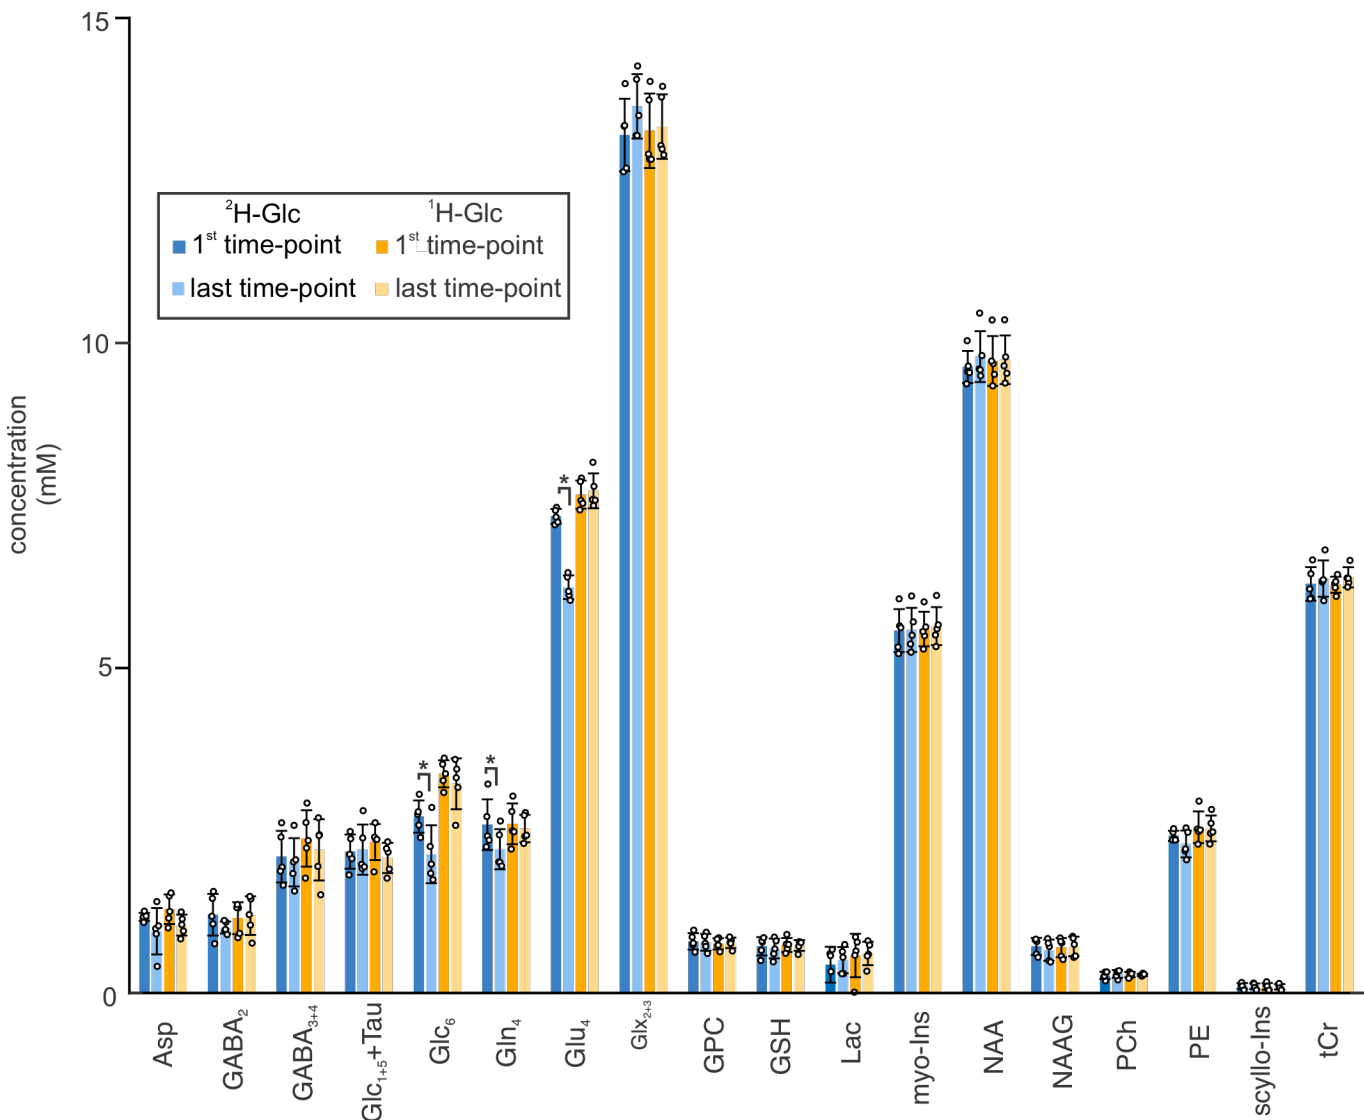

**Supplementary Fig.1 | Quantification of SV-MR spectra obtained in posterior cingulate with single-voxel proton MRS.** Bar diagrams demonstrate means (errors bars represent standard error of the mean) of concentration comparisons quantified from the first and last time-point spectra following <sup>2</sup>H-Glc and <sup>1</sup>H-Glc administration for 5 healthy volunteers. Peaks that originated from the specific carbon position undergoing deuteration, namely, the 6<sup>th</sup> carbon position for Glc (Glc<sub>6</sub>) the 4<sup>th</sup> carbon position for Glu (Glu<sub>4</sub>) and Gln (Gln<sub>4</sub>) and the 2<sup>nd</sup> carbon position for GABA (GABA<sub>2</sub>), were separated. Concentrations were compared with a standard, two-tailed, paired t-test between the first and last time-point within the <sup>2</sup>H-Glc and <sup>1</sup>H-Glc sessions. Concentration differences in Glc<sub>6</sub> ( $p = 0.0086$ ), Gln<sub>4</sub> ( $p = 0.0029$ ) and Glu<sub>4</sub> ( $p = 0.0003$ , no correction for multiple comparisons) appeared significant and reflect continuous concentration decrease over time, whereas all other metabolites were stable.

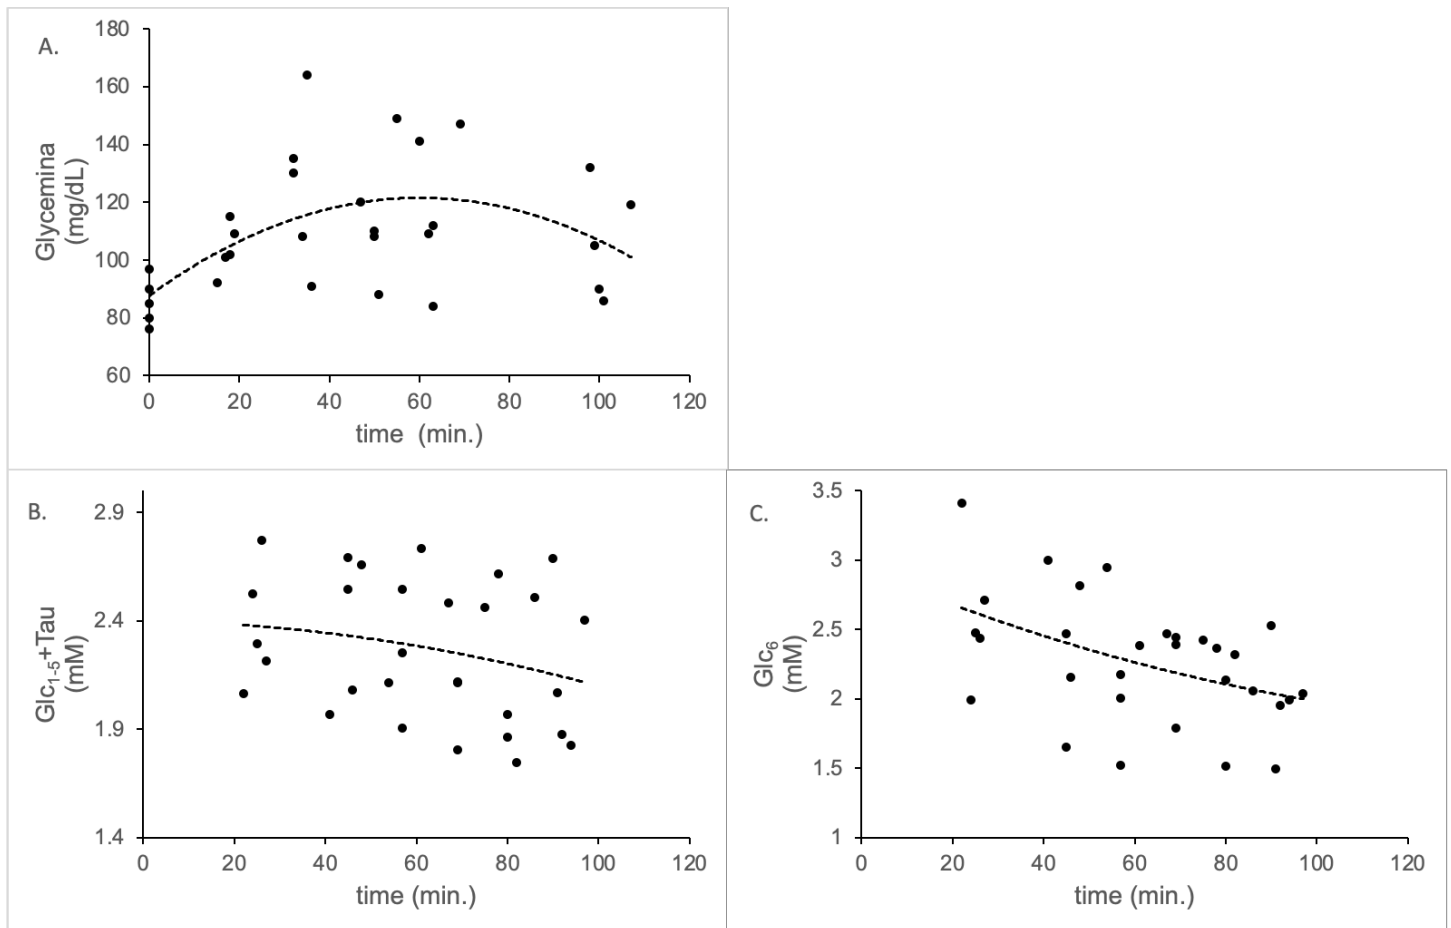

**Supplementary Fig. 2 |** Glycemia (panel A) and the separated glucose spectra components Glc<sub>1-5</sub>+Tau (panel B) and Glc<sub>6</sub> (panel C) measured in the brain. The values were measured in the session #2, after <sup>2</sup>H-Glc oral administration in 5 volunteers. The glycemic time-course reflects prolonged mild hyperglycemia as expected after oral administration of glucose load. While the Glc<sub>1-5</sub> is the non-deuterated part of the glucose molecule and according to LCMoDel strongly correlates with Tau, Glc<sub>6</sub> stands for the deuterated part of Glc and could be analyzed separately. Glc<sub>6</sub> time-course shows decrease reflecting the continuous <sup>2</sup>H-Glc supply into the brain.

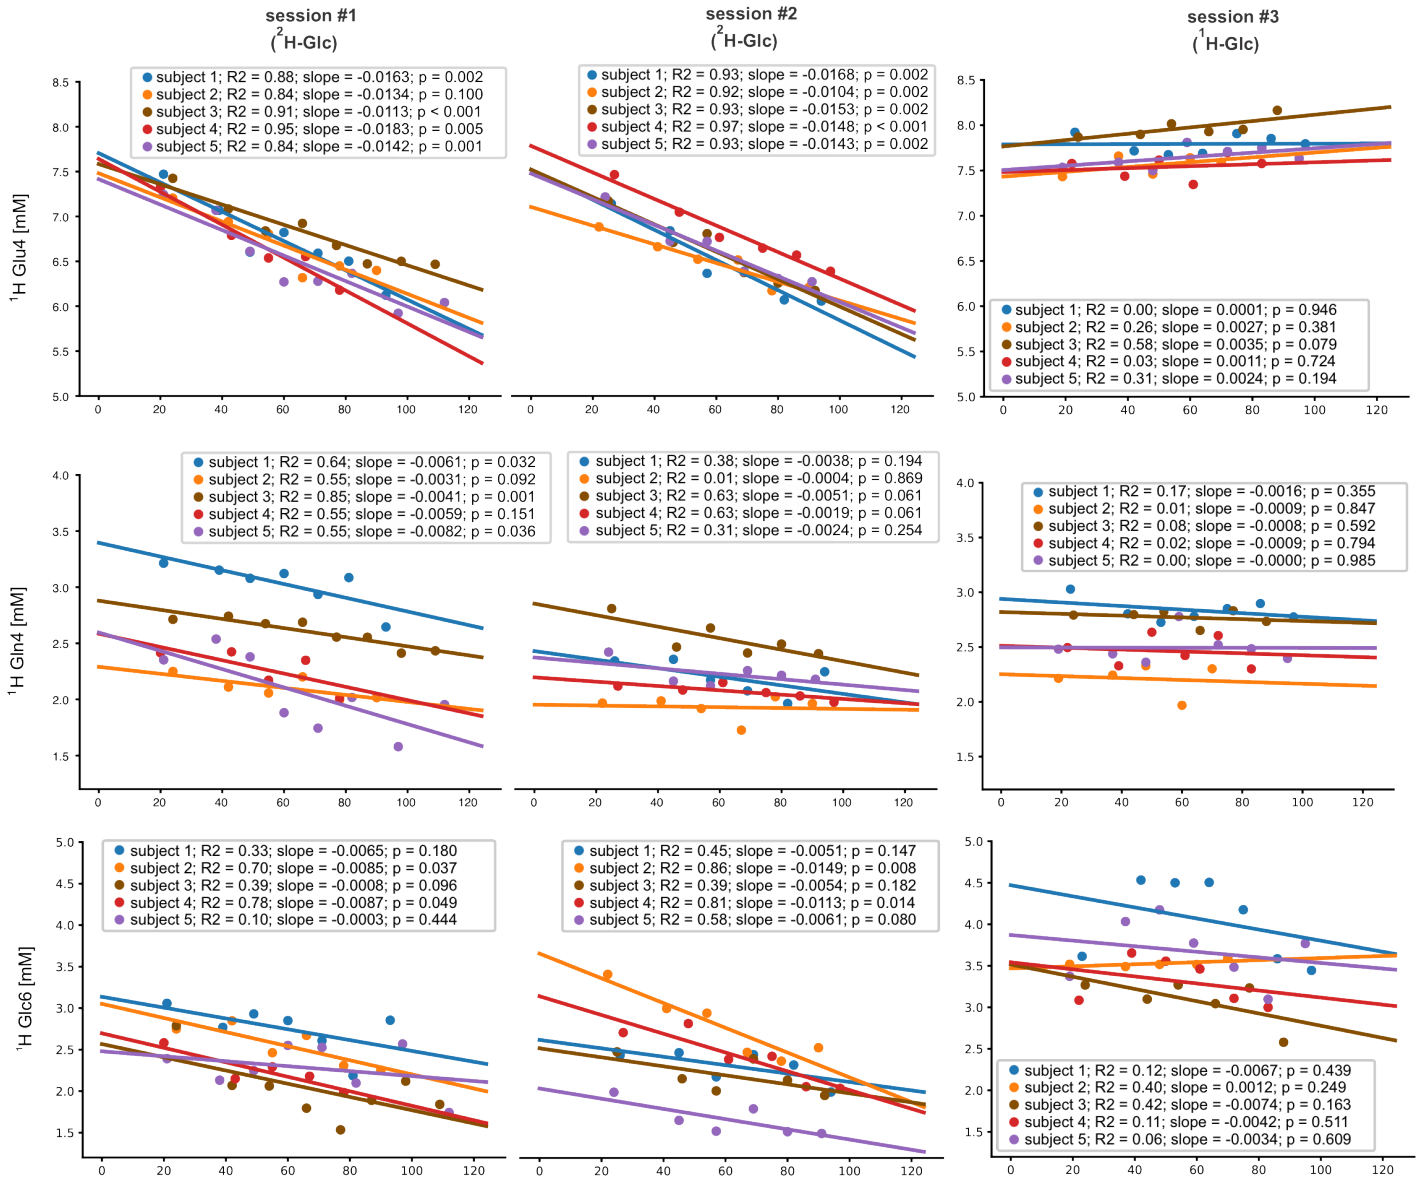

**Supplementary Fig. 3 | Linear fits of time-courses measured in 5 subjects in 3 sessions.**

While session number #1 and #2 were measured after oral administration of deuterated glucose, the session number #3 was conducted as a control experiment after administration of normal dextrose (non-deuterated Glc). Data were fitted with linear regression. The significance of the slopes was assessed by two-tailed test. P-values were not corrected for multiple comparisons.

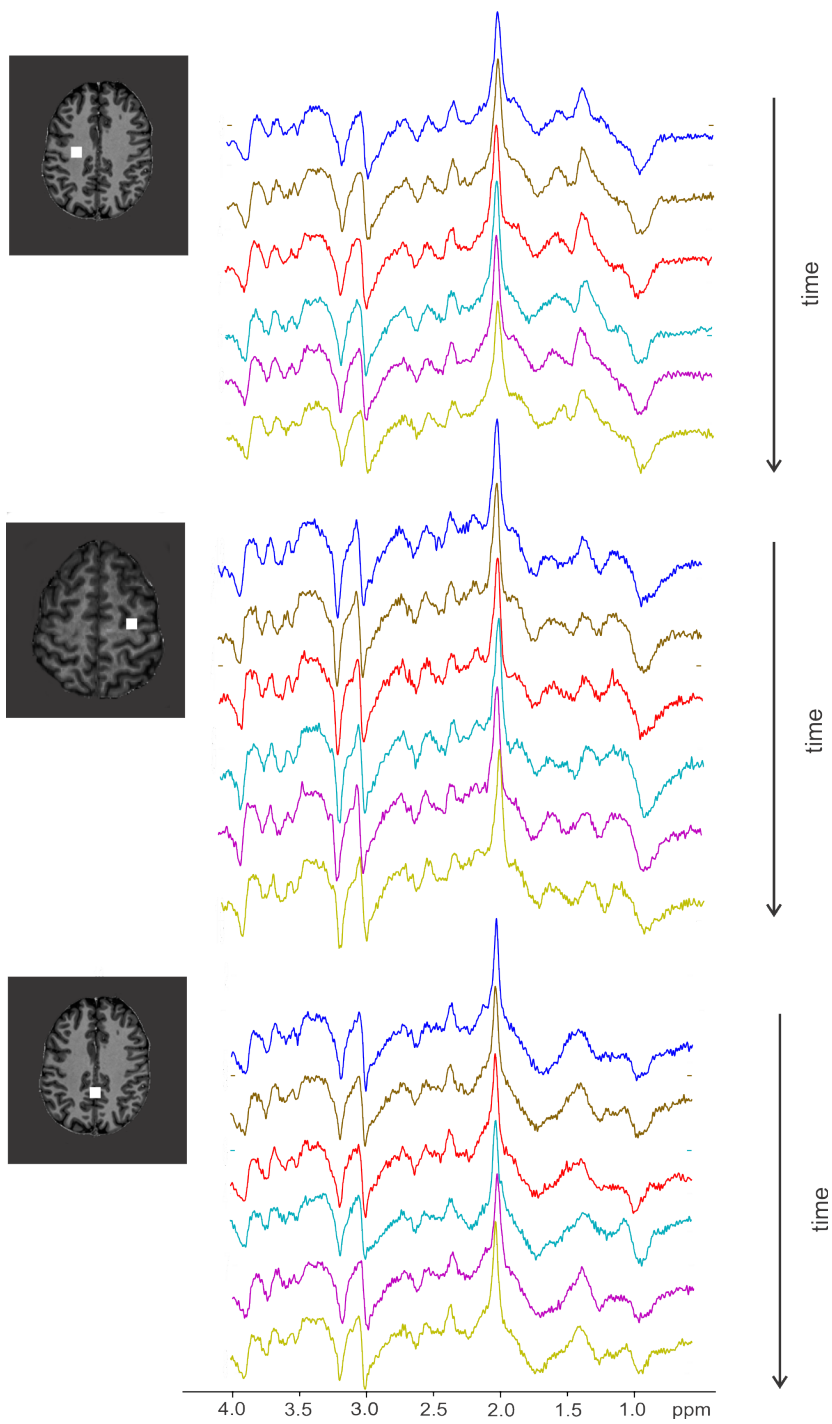

**Supplementary Fig. 4 |** Example of spectra time-series obtained from one individual in the white matter, in the posterior cingulate and precentral gyrus using 3D-<sup>1</sup>H-MRSI.

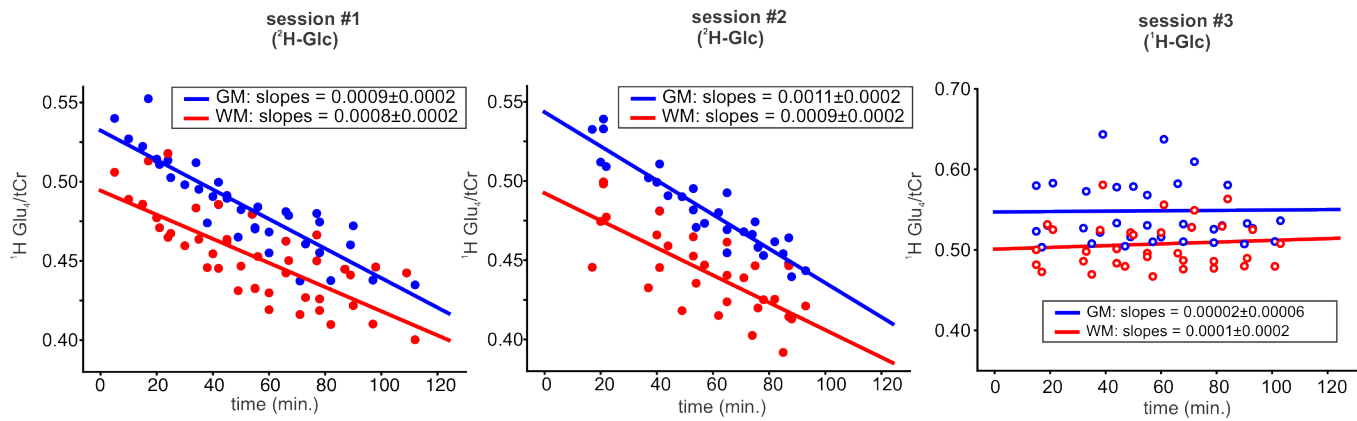

**Supplementary Fig. 5 | Repeatability of  $^1\text{H-MRSI}$  fits.** The time-courses from averaged regional maps were linearly fitted. The session #1 and #2 were scanned after  $2\text{H-Glc}$  ingestion, data in session #3 were acquired after  $1\text{H-Glc}$  ingestion as a control condition.

| Metabolite              | Posterior cingulum |           |            |                |            |         | Whole gray matter |           |           |               |           |         | Whole white matter |           |           |                |           |         |
|-------------------------|--------------------|-----------|------------|----------------|------------|---------|-------------------|-----------|-----------|---------------|-----------|---------|--------------------|-----------|-----------|----------------|-----------|---------|
|                         | conc.              | CV        | Δconc.     |                | Δconc.     |         | conc.             | CV        | Δconc.    |               | Δconc.    |         | conc.              | CV        | Δconc.    |                | Δconc.    |         |
|                         | (mean±SD)          | (mean±SD) | (mean±SD)  | p-value        | (mean±SD)  | p-value | (mean±SD)         | (mean±SD) | (mean±SD) | p-value       | (mean±SD) | p-value | (mean±SD)          | (mean±SD) | (mean±SD) | p-value        | (mean±SD) | p-value |
|                         | (/tCr)             | (%)       | (%)        |                | (%)        |         | (/tCr)            | (%)       | (%)       |               | (%)       |         | (/tCr)             | (%)       | (%)       |                | (%)       |         |
| Asp                     | 1.29±0.23          | 15.0±6.2  | 19.4±27.6  | 0.2002         | 17.1±18.0  | 0.11    | 0.44±0.02         | 6.2±8.0   | -5.9±6.4  | 0.107         | -3.4±1.8  | 0.01    | 0.47±0.03          | 3.9±2.4   | 1.6±1.5   | 0.0848         | -2.3±4.7  | 0.36    |
| GABA                    | –                  | –         | –          | –              | –          | –       | 0.23±0.02         | 2.9±1.7   | -3.0±4.4  | 0.215         | -5.1±7.4  | 0.20    | 0.23±0.01          | 2.8±1.1   | -2.2±4.8  | 0.3675         | -3.9±7.1  | 0.26    |
| GABA <sub>2</sub>       | 1.15±0.25          | 9.8±1.9   | 11.9±21.4  | 0.1909         | -3.6±15.6  | 0.60    | –                 | –         | –         | –             | –         | –       | –                  | –         | –         | –              | –         | –       |
| GABA <sub>3+4</sub>     | 2.38±0.43          | 14.1±7.5  | -2.9±16.8  | 0.5735         | -6.1±19.7  | 0.44    | –                 | –         | –         | –             | –         | –       | –                  | –         | –         | –              | –         | –       |
| Glc <sub>1-5</sub> +Tau | 2.32±0.28          | 12±4.3    | -1.3±11.8  | 0.8136         | 9.2±17.4   | 0.22    | –                 | –         | –         | –             | –         | –       | –                  | –         | –         | –              | –         | –       |
| Glc <sub>1-5</sub>      | 1.06±0.23          | 23.9±9.6  | 1.0±24.4   | 0.8801         | 16.8±34.4  | 0.22    | –                 | –         | –         | –             | –         | –       | –                  | –         | –         | –              | –         | –       |
| Glc <sub>6</sub>        | 3.37±0.21          | 8.2±4.3   | 21.8±10.3  | <b>0.0086*</b> | 4.5±10.8   | 0.38    | –                 | –         | –         | –             | –         | –       | –                  | –         | –         | –              | –         | –       |
| Gln                     | –                  | –         | –          | –              | –          | –       | 0.30±0.03         | 6.3±4.1   | -4.8±7.9  | 0.288         | -3.1±8.5  | 0.46    | 0.30±0.02          | 5.5±3.1   | 0.3±6.2   | 0.8439         | -9.4±8.8  | 0.07    |
| Gln <sub>2+3</sub>      | –                  | –         | –          | –              | –          | –       | –                 | –         | –         | –             | –         | –       | –                  | –         | –         | –              | –         | –       |
| Gln <sub>4</sub>        | 2.60±0.31          | 4.5±1.6   | 14.4±3.7   | <b>0.0029*</b> | 2.4±4.4    | 0.25    | –                 | –         | –         | –             | –         | –       | –                  | –         | –         | –              | –         | –       |
| Glu <sub>2+3</sub>      | –                  | –         | –          | –              | –          | –       | 0.72±0.04         | 2.3±2.6   | -5.1±2.6  | 0.012         | -4.2±6.7  | 0.23    | 0.71±0.02          | 2.7±2.7   | -5.1±2.3  | 0.0068         | -3.9±6.8  | 0.28    |
| Glu <sub>4</sub>        | 7.67±0.22          | 1.4±0.1   | 14.9±2.8   | <b>0.0003*</b> | -0.8±2.2   | 0.49    | 0.54±0.04         | 1.7±1.8   | 13.4±3.5  | <b>0.001*</b> | -0.7±1.3  | 0.35    | 0.50±0.03          | 1.6±1.5   | 14.0±2.9  | <b>0.0007*</b> | -2.4±3.8  | 0.24    |
| Glx <sub>2+3</sub>      | 13.26±0.57         | 1.1±0.1   | -3.4±3.0   | 0.0651         | -0.5±0.7   | 0.19    | –                 | –         | –         | –             | –         | –       | –                  | –         | –         | –              | –         | –       |
| GPC                     | 0.76±0.09          | 4.3±1.0   | 1.9±3.8    | 0.3373         | -2.4±4.0   | 0.30    | –                 | –         | –         | –             | –         | –       | –                  | –         | –         | –              | –         | –       |
| GSH                     | 0.74±0.11          | 8.0±4.4   | 4.8±7.7    | 0.2804         | 0.3±10.0   | 0.85    | –                 | –         | –         | –             | –         | –       | –                  | –         | –         | –              | –         | –       |
| myo-Ins                 | 5.60±0.27          | 1.0±0.2   | -0.2±1.6   | 0.7935         | -0.8±1.1   | 0.20    | 0.82±0.05         | 2.3±0.9   | -0.1±2.7  | 0.931         | -0.6±2.7  | 0.65    | 0.84±0.07          | 2.2±0.6   | -0.4±2.6  | 0.7662         | -0.7±3.8  | 0.74    |
| Lac                     | 0.61±0.27          | 23.0±23.2 | -11.1±24.7 | 0.3110         | -18.6±54.1 | 0.95    | –                 | –         | –         | –             | –         | –       | –                  | –         | –         | –              | –         | –       |
| NAA                     | 9.72±0.38          | 1.1±0.7   | -1.6±2.3   | 0.1861         | -0.2±0.7   | 0.55    | –                 | –         | –         | –             | –         | –       | –                  | –         | –         | –              | –         | –       |
| NAAG                    | 0.70±0.15          | 8.2±3.2   | 8.8±7.4    | 0.0527         | -2.7±5.8   | 0.34    | –                 | –         | –         | –             | –         | –       | –                  | –         | –         | –              | –         | –       |
| PCh                     | 0.28±0.04          | 12.0±3.5  | -9.1±8.1   | 0.0676         | -0.6±19.0  | 0.86    | –                 | –         | –         | –             | –         | –       | –                  | –         | –         | –              | –         | –       |
| PE                      | 2.55±0.24          | 3.6±1.2   | 5.2±7.8    | 0.2085         | 0.4±6.8    | 0.82    | –                 | –         | –         | –             | –         | –       | –                  | –         | –         | –              | –         | –       |
| scyllo-Ins              | 0.10±0.05          | 12.7±6.3  | 2.4±14.1   | 0.6303         | 1.4±18.6   | 0.54    | –                 | –         | –         | –             | –         | –       | –                  | –         | –         | –              | –         | –       |
| Tau                     | 1.26±0.15          | 3.9±0.3   | -3.5±5.6   | 0.2474         | 2.1±4.0    | 0.26    | 0.35±0.02         | 4.2±1.2   | -5.9±5.6  | 0.077         | -1.2±6.2  | 0.69    | 0.38±0.03          | 3.6±1.5   | -3.4±9.7  | 0.4758         | -3.0±7.2  | 0.39    |
| tCh                     | 1.04±0.06          | 1.8±0.6   | -1.0±4.5   | 0.6782         | -1.2±3.9   | 0.53    | 0.33±0.02         | 0.9±0.8   | -2.3±1.8  | 0.050         | -0.5±1.9  | 0.60    | 0.35±0.23          | 1.0±0.6   | -1.7±1.8  | 0.1051         | -0.9±2.1  | 0.43    |
| tCr                     | 6.28±0.12          | 1.3±0.5   | -1.3±2.4   | 0.2870         | -1.8±1.5   | 0.05    | 1.00±0.00         | –         | –         | –             | –         | –       | 1.00±0.00          | –         | –         | –              | –         | –       |
| tNAA                    | 10.42±0.49         | 1.2±0.7   | -1.0±2.3   | 0.4015         | -0.3±0.5   | 0.19    | 1.47±0.08         | 1.9±2.5   | 1.1±3.9   | 0.575         | -1.2±2.2  | 0.30    | 1.59±0.06          | 1.7±2.2   | 1.4±3.2   | 0.4114         | -0.3±2.1  | 0.78    |

**Supplementary Table 1** | Metabolite concentration estimates, stability, and temporal changes with and without deuterated glucose all healthy volunteers (N = 5). Data are calculated from concentrations quantified in  $\mu\text{mol/g}$  for single-voxel  $^1\text{H-MRS}$  and referenced to total creatine (tCr) for 3D- $^1\text{H-MRSI}$ . The regional means from the gray and white matter voxels were used to calculate between-subject averages in metabolite concentrations. The average concentrations and their respective coefficients of variations were measured immediately after  $^1\text{H-Glc}$  administration (the first time-point). The within-session differences were calculated by subtracting the concentrations of the first and last data point, and their statistical significance was assessed via a standard, two-tailed, paired t-test (separately for  $^2\text{H-Glc}$  and  $^1\text{H-Glc}$  scans). The asterisks indicate statistical significance after correction for multiple comparisons with the false discovery rate method, which limited the likelihood of false positives to 7% (single-voxel data) and 3% (MRSI data).
